# Supplementary material for: An efficient combination of BEST and NUS methods in multidimensional NMR spectroscopy for high throughput analysis of proteins
Source: Royal Society of Chemistry journal article supplement (doi:10.1039/c8ra00527c), 2018-01-01
Supplement: c8ra00527c1.pdf [file c8ra00527c1.pdf]

## **Supporting Information**

An Efficient Combination of BEST and NUS Methods in Multidimensional NMR  
Spectroscopy: High Throughput Analysis of Proteins

### **Experimental details of $\alpha$ -Synuclein protein (600 MHz)**

| Experiment: 3D-HNN<br>Sample: $\alpha$ -Synuclein<br>Number of Scans: 8<br>Recycle Delay: 1s<br>Experimental Time: ~5 hr 20 min |                        |                     |                        |                     |                              |                                   |                         |
|---------------------------------------------------------------------------------------------------------------------------------|------------------------|---------------------|------------------------|---------------------|------------------------------|-----------------------------------|-------------------------|
| Dimension                                                                                                                       | Acquisition parameters |                     |                        |                     |                              |                                   | Processing parameters   |
|                                                                                                                                 | Size of FID            | Spectral Width (Hz) | Acquisition time (sec) | FID resolution (Hz) | Spectrometer Frequency (MHz) | Transmitter Frequency Offset (Hz) | Number of points filled |
| F3                                                                                                                              | 1024                   | 7211.54             | 0.071                  | 14.1                | 600.4                        | 4.7                               | 1024                    |
| F2                                                                                                                              | 40                     | 2129.59             | 0.0094                 | 106.5               | 60.84                        | 119.0                             | 256                     |
| F1                                                                                                                              | 40                     | 2129.59             | 0.0094                 | 106.5               | 60.84                        | 119.0                             | 256                     |

| Experiment: 3D-BEST-HNN<br>Sample: $\alpha$ -Synuclein<br>Number of Scans: 8<br>Recycle Delay: 0.2s<br>Experimental Time: ~14 hr 52 min |                        |                     |                        |                     |                              |                                   |                         |
|-----------------------------------------------------------------------------------------------------------------------------------------|------------------------|---------------------|------------------------|---------------------|------------------------------|-----------------------------------|-------------------------|
| Dimension                                                                                                                               | Acquisition parameters |                     |                        |                     |                              |                                   | Processing parameters   |
|                                                                                                                                         | Size of FID            | Spectral Width (Hz) | Acquisition time (sec) | FID resolution (Hz) | Spectrometer Frequency (MHz) | Transmitter Frequency Offset (Hz) | Number of points filled |
| F3                                                                                                                                      | 1024                   | 7211.54             | 0.071                  | 14.1                | 600.4                        | 4.7                               | 1024                    |
| F2                                                                                                                                      | 128                    | 2129.59             | 0.03                   | 33.3                | 60.84                        | 119.0                             | 256                     |
| F1                                                                                                                                      | 128                    | 2129.59             | 0.03                   | 33.3                | 60.84                        | 119.0                             | 256                     |

| Experiment: 3D-NUS-BEST-HNN (10% Random sampling)<br>Sample: $\alpha$ -Synuclein<br>Number of Scans: 8<br>Recycle Delay: 0.2s<br>Experimental Time: ~1 hr 29 min |                        |                     |                        |                     |                              |                                   |                         |
|------------------------------------------------------------------------------------------------------------------------------------------------------------------|------------------------|---------------------|------------------------|---------------------|------------------------------|-----------------------------------|-------------------------|
| Dimension                                                                                                                                                        | Acquisition parameters |                     |                        |                     |                              |                                   | Processing parameters   |
|                                                                                                                                                                  | Size of FID            | Spectral Width (Hz) | Acquisition time (sec) | FID resolution (Hz) | Spectrometer Frequency (MHz) | Transmitter Frequency Offset (Hz) | Number of points filled |
| F3                                                                                                                                                               | 1024                   | 7211.54             | 0.071                  | 14.1                | 600.4                        | 4.7                               | 1024                    |
| F2                                                                                                                                                               | 128                    | 2129.59             | 0.03                   | 33.3                | 60.84                        | 119.0                             | 256                     |
| F1                                                                                                                                                               | 128                    | 2129.59             | 0.03                   | 33.3                | 60.84                        | 119.0                             | 256                     |

### Experimental details of Ubiquitin protein (600 MHz / 750 MHz)

| Experiment: <a href="#">3D-BEST-HNN</a>          |                        |                     |                        |                     |                              |                                   |                         |
|--------------------------------------------------|------------------------|---------------------|------------------------|---------------------|------------------------------|-----------------------------------|-------------------------|
| Sample: <a href="#">Ubiquitin</a>                |                        |                     |                        |                     |                              |                                   |                         |
| Number of Scans: 8                               |                        |                     |                        |                     |                              |                                   |                         |
| Recycle Delay: <a href="#">0.2s</a>              |                        |                     |                        |                     |                              |                                   |                         |
| Experimental Time: <a href="#">~14 hr 52 min</a> |                        |                     |                        |                     |                              |                                   |                         |
| Dimension                                        | Acquisition parameters |                     |                        |                     |                              |                                   | Processing parameters   |
|                                                  | Size of FID            | Spectral Width (Hz) | Acquisition time (sec) | FID resolution (Hz) | Spectrometer Frequency (MHz) | Transmitter Frequency Offset (Hz) | Number of points filled |
| F3                                               | 1024                   | 7211.54             | 0.071                  | 14.1                | 600.4                        | 4.7                               | 1024                    |
| F2                                               | 128                    | 2129.59             | 0.03                   | 33.3                | 60.84                        | 116.5                             | 256                     |
| F1                                               | 128                    | 2129.59             | 0.03                   | 33.3                | 60.84                        | 116.5                             | 256                     |

| Experiment: <a href="#">3D-BEST-HNCO</a>        |                        |                     |                        |                     |                              |                                   |                         |
|-------------------------------------------------|------------------------|---------------------|------------------------|---------------------|------------------------------|-----------------------------------|-------------------------|
| Sample: <a href="#">Ubiquitin</a>               |                        |                     |                        |                     |                              |                                   |                         |
| Number of Scans: 8                              |                        |                     |                        |                     |                              |                                   |                         |
| Recycle Delay: <a href="#">0.2s</a>             |                        |                     |                        |                     |                              |                                   |                         |
| Experimental Time: <a href="#">~7 hr 23 min</a> |                        |                     |                        |                     |                              |                                   |                         |
| Dimension                                       | Acquisition parameters |                     |                        |                     |                              |                                   | Processing parameters   |
|                                                 | Size of FID            | Spectral Width (Hz) | Acquisition time (sec) | FID resolution (Hz) | Spectrometer Frequency (MHz) | Transmitter Frequency Offset (Hz) | Number of points filled |
| F3                                              | 698                    | 10504.2             | 0.033                  | 30.1                | 750.28                       | 4.7                               | 1024                    |
| F2                                              | 96                     | 2737.23             | 0.0175                 | 57.0                | 76.03                        | 116.5                             | 256                     |
| F1                                              | 96                     | 2452.98             | 0.0196                 | 51.1                | 188.66                       | 172.5                             | 256                     |

| Experiment: <a href="#">3D-BEST-HN(CO)CACB</a>  |                        |                     |                        |                     |                              |                                   |                         |
|-------------------------------------------------|------------------------|---------------------|------------------------|---------------------|------------------------------|-----------------------------------|-------------------------|
| Sample: <a href="#">Ubiquitin</a>               |                        |                     |                        |                     |                              |                                   |                         |
| Number of Scans: 8                              |                        |                     |                        |                     |                              |                                   |                         |
| Recycle Delay: <a href="#">0.2s</a>             |                        |                     |                        |                     |                              |                                   |                         |
| Experimental Time: <a href="#">~7 hr 58 min</a> |                        |                     |                        |                     |                              |                                   |                         |
| Dimension                                       | Acquisition parameters |                     |                        |                     |                              |                                   | Processing parameters   |
|                                                 | Size of FID            | Spectral Width (Hz) | Acquisition time (sec) | FID resolution (Hz) | Spectrometer Frequency (MHz) | Transmitter Frequency Offset (Hz) | Number of points filled |
| F3                                              | 698                    | 10504.2             | 0.033                  | 30.1                | 750.28                       | 4.7                               | 1024                    |
| F2                                              | 96                     | 2737.23             | 0.0175                 | 57.0                | 76.03                        | 116.5                             | 256                     |
| F1                                              | 96                     | 2452.98             | 0.0196                 | 51.1                | 188.66                       | 41.0                              | 256                     |

Experiment: 3D-NUS-BEST-HNN (10% Random sampling)

Sample: Ubiquitin

Number of Scans: 8

Recycle Delay: 0.2s

Experimental Time: ~1 hr 29 min

| Dimension | Acquisition parameters |                     |                        |                     |                              |                                   | Processing parameters   |
|-----------|------------------------|---------------------|------------------------|---------------------|------------------------------|-----------------------------------|-------------------------|
|           | Size of FID            | Spectral Width (Hz) | Acquisition time (sec) | FID resolution (Hz) | Spectrometer Frequency (MHz) | Transmitter Frequency Offset (Hz) | Number of points filled |
| F3        | 1024                   | 7211.54             | 0.071                  | 14.1                | 600.4                        | 4.7                               | 1024                    |
| F2        | 128                    | 2129.59             | 0.03                   | 33.3                | 60.84                        | 116.5                             | 256                     |
| F1        | 128                    | 2129.59             | 0.03                   | 33.3                | 60.84                        | 116.5                             | 256                     |

Experiment: 3D-NUS-BEST-HNCO (5% Random sampling)

Sample: Ubiquitin

Number of Scans: 8

Recycle Delay: 0.2s

Experimental Time: ~22 min

| Dimension | Acquisition parameters |                     |                        |                     |                              |                                   | Processing parameters   |
|-----------|------------------------|---------------------|------------------------|---------------------|------------------------------|-----------------------------------|-------------------------|
|           | Size of FID            | Spectral Width (Hz) | Acquisition time (sec) | FID resolution (Hz) | Spectrometer Frequency (MHz) | Transmitter Frequency Offset (Hz) | Number of points filled |
| F3        | 698                    | 10504.2             | 0.033                  | 30.1                | 750.28                       | 4.7                               | 1024                    |
| F2        | 96                     | 2737.23             | 0.0175                 | 57.0                | 76.03                        | 116.5                             | 256                     |
| F1        | 96                     | 2452.98             | 0.0196                 | 51.1                | 188.66                       | 172.5                             | 256                     |

Experiment: 3D-NUS-BEST-HN(CO)CACB (5% Random sampling)

Sample: Ubiquitin

Number of Scans: 8

Recycle Delay: 0.2s

Experimental Time: ~28 min

| Dimension | Acquisition parameters |                     |                        |                     |                              |                                   | Processing parameters   |
|-----------|------------------------|---------------------|------------------------|---------------------|------------------------------|-----------------------------------|-------------------------|
|           | Size of FID            | Spectral Width (Hz) | Acquisition time (sec) | FID resolution (Hz) | Spectrometer Frequency (MHz) | Transmitter Frequency Offset (Hz) | Number of points filled |
| F3        | 698                    | 10504.2             | 0.033                  | 30.1                | 750.28                       | 4.7                               | 1024                    |
| F2        | 96                     | 2737.23             | 0.0175                 | 57.0                | 76.03                        | 116.5                             | 256                     |
| F1        | 96                     | 2452.98             | 0.0196                 | 51.1                | 188.66                       | 41.0                              | 256                     |

**Processing parameters: NUS-BEST-HNN spectra (on Topspin 4.0.1)**

| <b>Processing method</b> | <b>Number of iterations</b> | <b>Processing time*</b> |
|--------------------------|-----------------------------|-------------------------|
| MDD                      | 1000                        | 7 hr                    |
| IST                      | 10000                       | 1 hr 50 min             |
| IRLS                     | 100                         | 13 hr 40 min            |

\* These are the typical processing times, when the data has been processed on a regular workstation connected with a Bruker NMR spectrometer. Indeed, they may reduce significantly, if we process the data on high power super computers/ cluster systems.

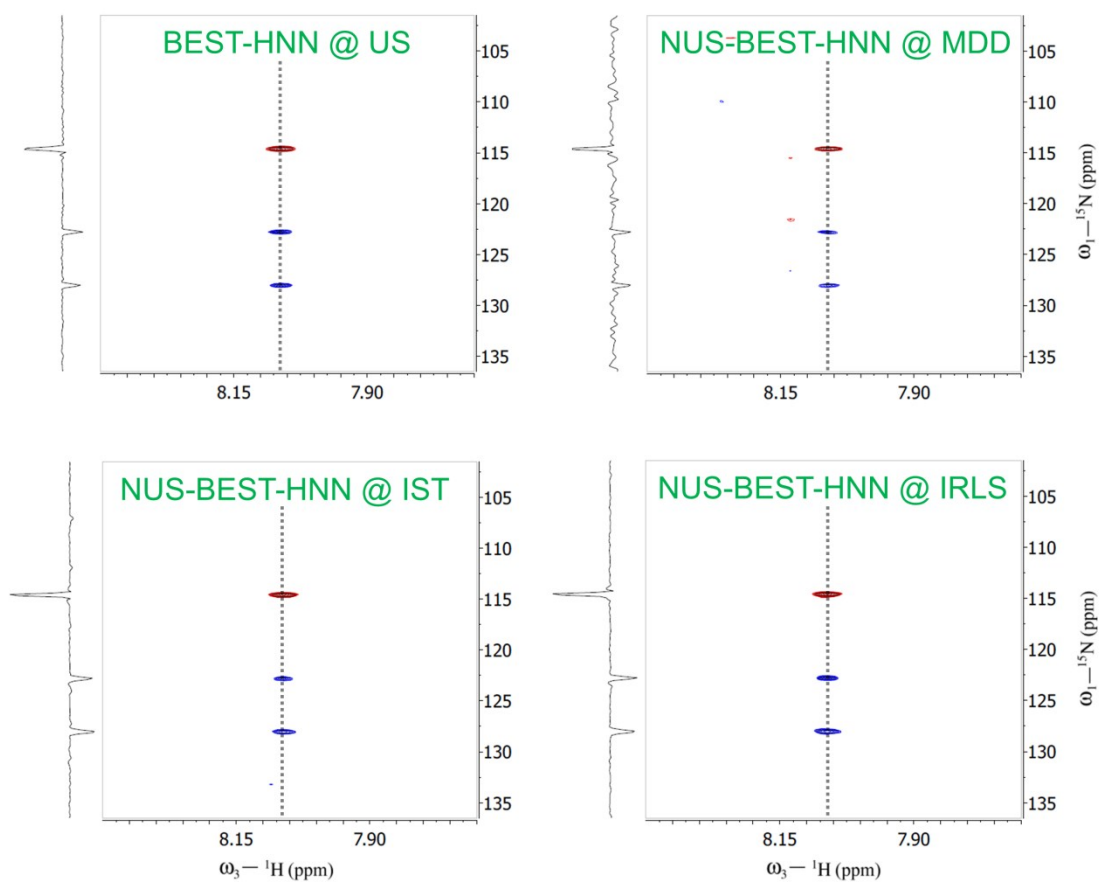

**S. Figure. 1:** Comparison of the 13-plane projections of BEST-HNN spectra recorded for  $\alpha$ -Synuclein in uniformly sampled (US) and non-uniformly sampled (NUS) experimental conditions. Here, NUS-BEST-HNN has been processed in different processing schemes, viz, MDD, IST, and IRLS. The 1D-traces obtained at chemical shift of T54 residue have been shown in dotted lines and added as external projections. Further, these 1D-traces are compared in the S. Figure. 2.

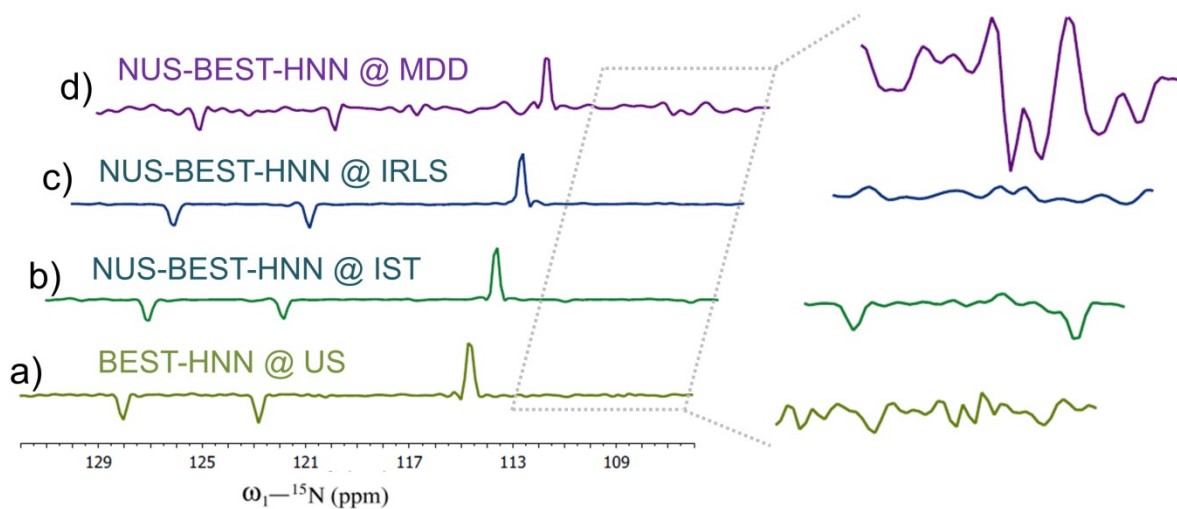

**S. Figure. 2:** Comparison of the 1D-traces of BEST-HNN spectra (T54 residue of 13-plane projection) recorded in uniformly sampled (US, a) and non-uniformly sampled (NUS, b, c, d) experimental conditions. Here, NUS-BEST-HNN has been processed in different processing schemes, viz, IST (b), IRLS (c), and MDD (d). A close comparison of the noise regions of these traces revealed that the IRLS processing has resulted in a very clean spectrum (free from false peaks), when compared with the other MDD and IST processing methods. Hence, we have adopted IRLS processing for all the NUS acquired spectra.

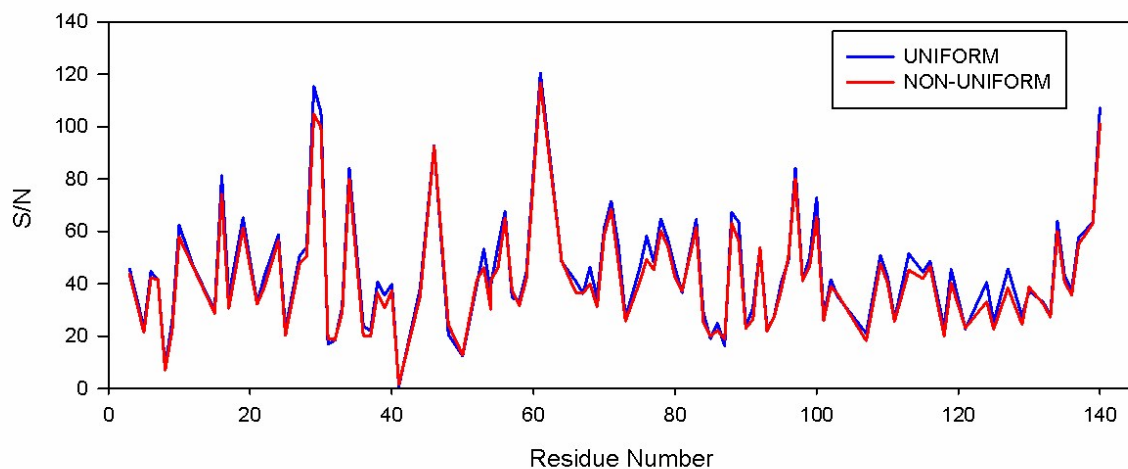

**S. Figure. 3:** Residue wise Signal to noise ratio (S/N) comparison (from BEST-HNN) for the  $\alpha$ -Synuclein protein recorded in uniformly sampled and non-uniformly sampled acquisition modes. The diagonal peaks in the F1-F3 planes have been used; note that although the diagonals of Gly residues have negative intensities, the S/N ratio is represented as a positive number in every case.



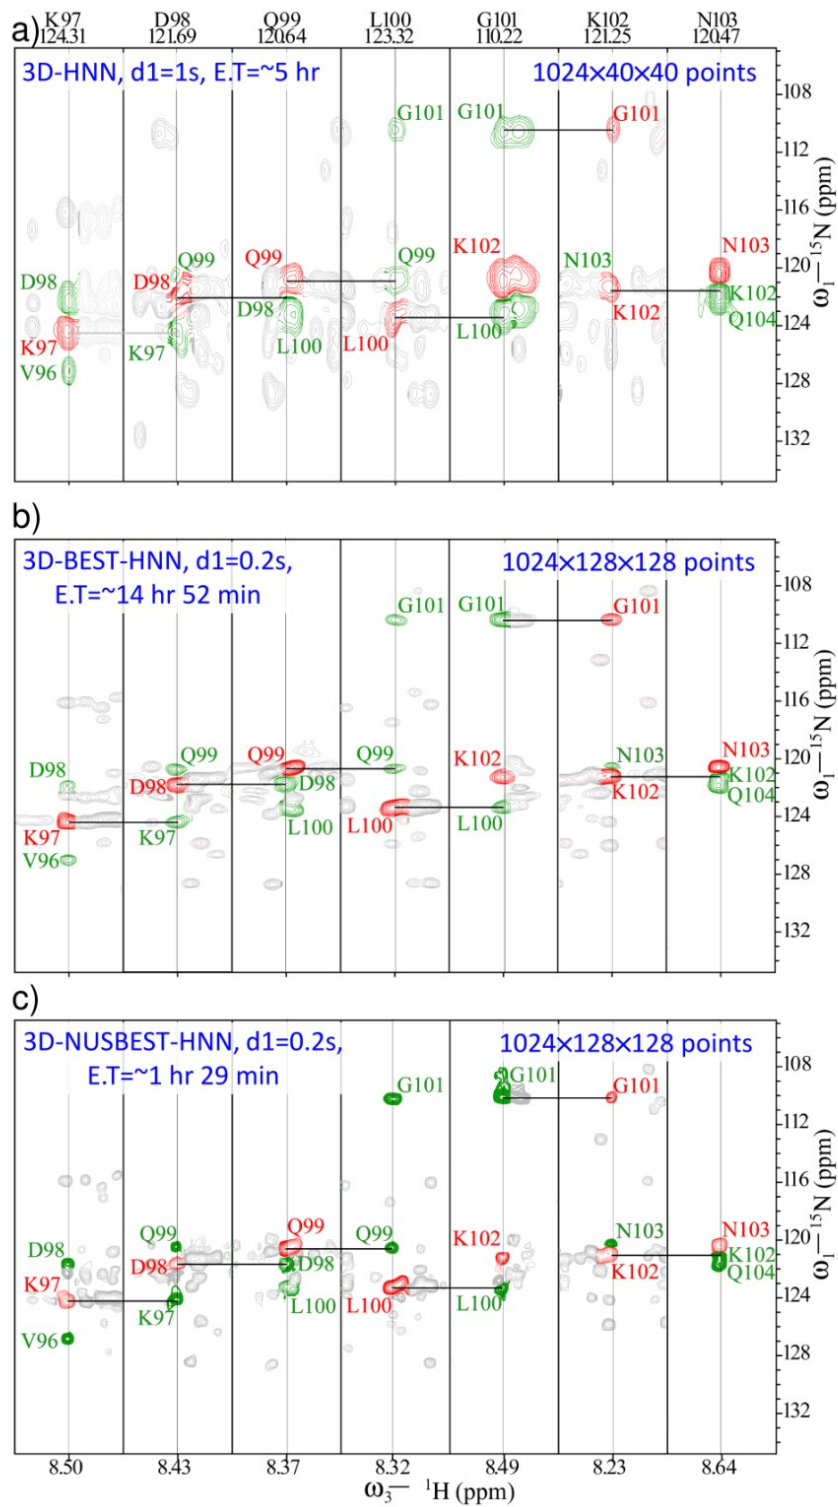

**S. Figure. 4:** Comparison of 3D-HNN spectra of  $\alpha$ -Synuclein recorded in different experimental schemes; a) conventional-HNN, b) BEST-HNN, and c) NUS-BEST-HNN. Herein, unambiguous  ${}^{15}\text{N}$  chemical shift assignments have been achieved with the aid of 3D-NUS-BEST-HNN, recorded in only  $\sim$  1 hr 29 min of experimental time.

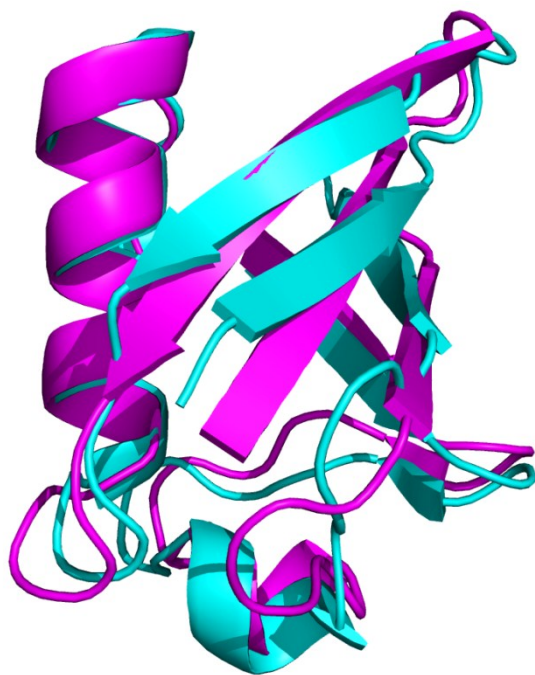

**S. Figure. 5: Comparison of chemical shift based structure with the structure derived from NOE assignments.** Chemical shift based (CS-ROSETTA) and NOE-derived structures of Ubiquitin (PDB ID: 1D3Z) are shown in magenta and cyan colors, respectively.

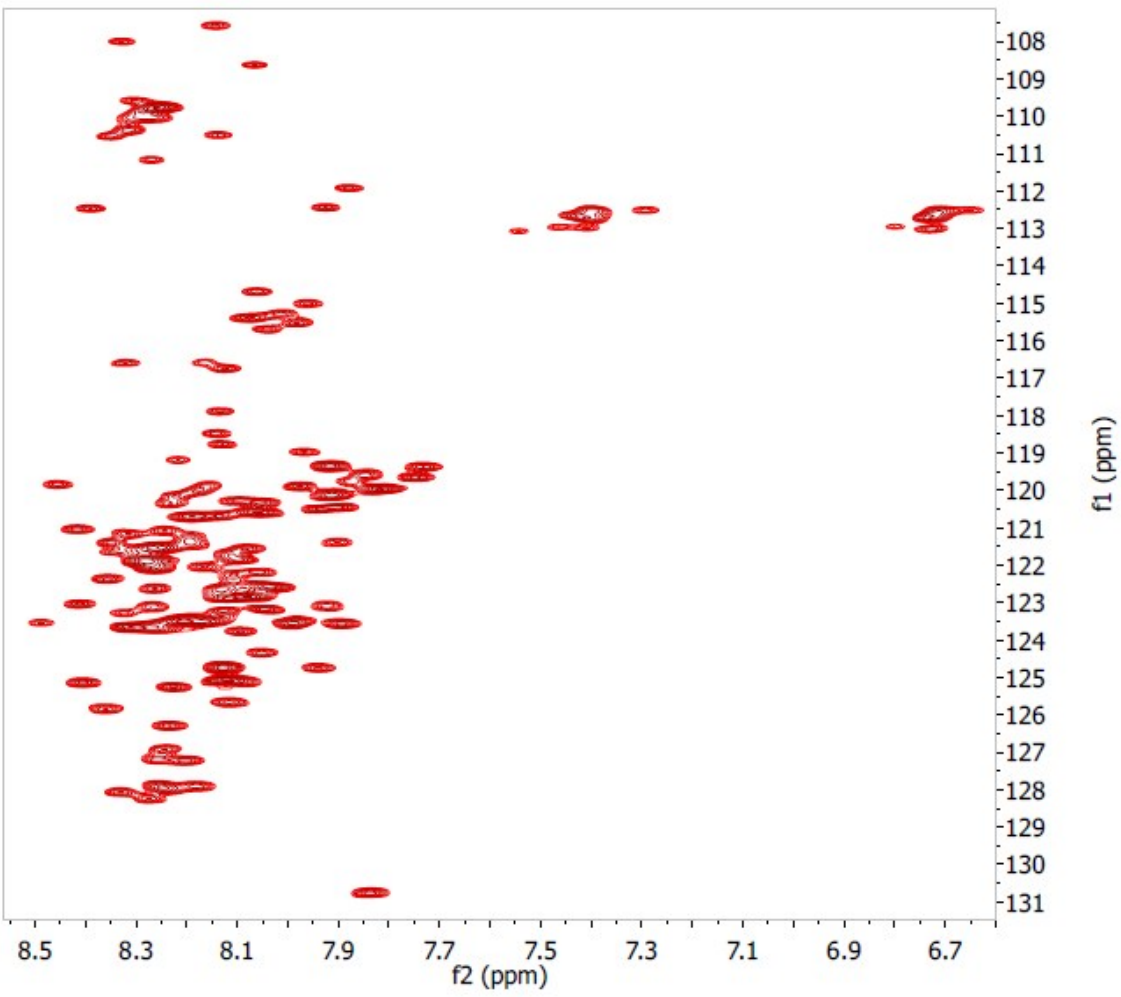

**S. Figure.6:**  $^1\text{H}$ - $^{15}\text{N}$  HSQC NMR spectrum of  $^{15}\text{N}$ ,  $^{13}\text{C}$  labeled  $\alpha$ -Synuclein.

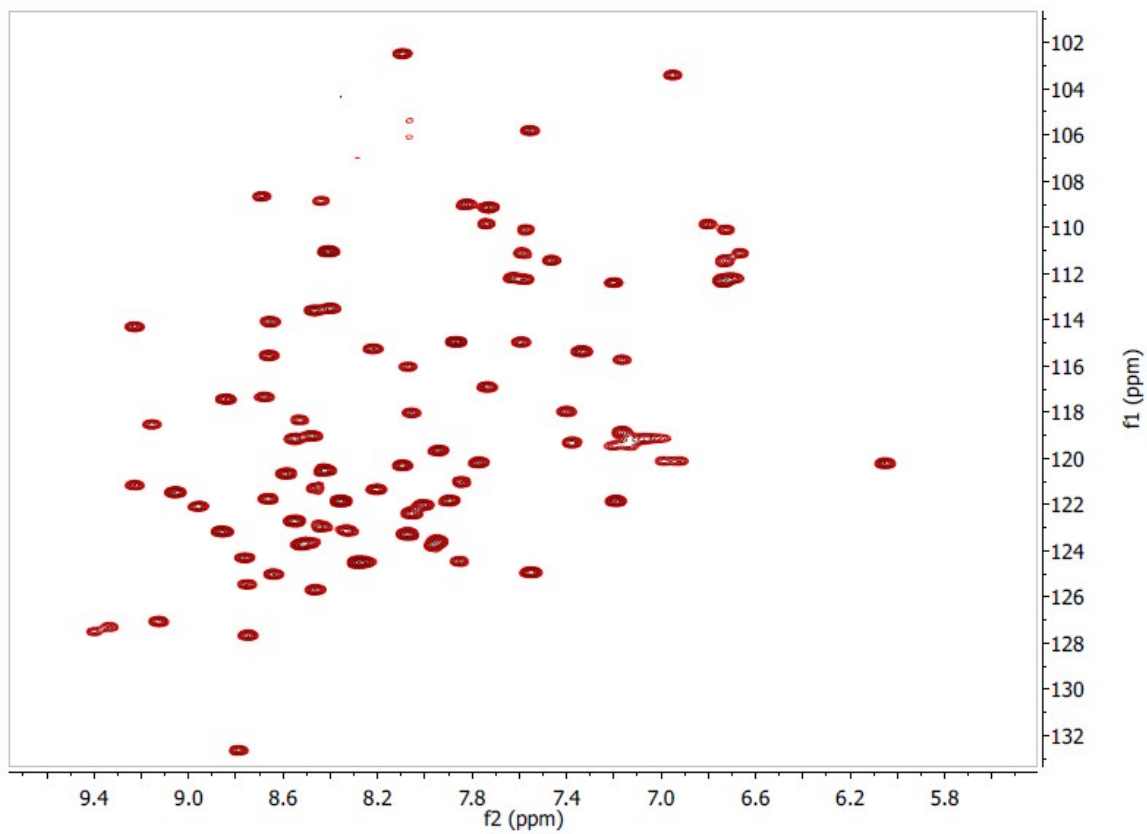

**S. Figure.7:**  $^1\text{H}$ - $^{15}\text{N}$  HSQC NMR spectrum of  $^{15}\text{N}$ ,  $^{13}\text{C}$  labeled ubiquitin.
